# Supplementary material for: Evolution of NO 3 reactivity during the oxidation of isoprene
Source: Copernicus journal article supplement (doi:10.5194/acp-20-10459-2020), 2020-09-08
Supplement: Supplementary file 1 [file acp-20-10459-2020-supplement.pdf]

Supplement of Atmos. Chem. Phys., 20, 10459–10475, 2020  
<https://doi.org/10.5194/acp-20-10459-2020-supplement>  
© Author(s) 2020. This work is distributed under  
the Creative Commons Attribution 4.0 License.

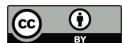

*Supplement of*

## **Evolution of NO<sub>3</sub> reactivity during the oxidation of isoprene**

**Patrick Dewald et al.**

*Correspondence to:* John N. Crowley ([john.crowley@mpic.de](mailto:john.crowley@mpic.de))

The copyright of individual parts of the supplement might differ from the CC BY 4.0 License.

**Table S1: Reactions, rate coefficients and definitions in the model used for analysis. The isoprene oxidation scheme until the 3<sup>rd</sup> / 4<sup>th</sup> generation from the Master Chemical Mechanism (MCM) version 3.3.1 is used (Jenkin et al., 2015). Any change from MCMv3.3.1 is annotated.**

| Reaction             | Reaction constant                                                                                                                                                                                                                                                                                                      | Annotations         |
|----------------------|------------------------------------------------------------------------------------------------------------------------------------------------------------------------------------------------------------------------------------------------------------------------------------------------------------------------|---------------------|
| <b>NOx chemistry</b> |                                                                                                                                                                                                                                                                                                                        |                     |
| N2O5 → NO3 + NO2     | $((1.3e-3*(T/300)^{-3.5}*\exp(-11000/T))*M*(9.7e14*(T/300)^{0.1}*\exp(-11080/T)))/((1.3e-3*(T/300)^{-3.5}*\exp(-11000/T))*M+(9.7e14*(T/300)^{0.1}*\exp(-11080/T))*10@(\log_{10}(0.35)/(1+(\log_{10}((1.3e-3*(T/300)^{-3.5}*\exp(-11000/T))*M/(9.7e14*(T/300)^{0.1}*\exp(-11080/T))))/(0.75-1.27*\log_{10}(0.35)))@2))$ |                     |
| NO2 + NO3 → N2O5     | $((3.6e-30*(T/300)^{-4.1})*M*(1.9e-12*(T/300)^{0.2}))/((3.6e-30*(T/300)^{-4.1})*M+(1.9e-12*(T/300)^{0.2})*10@(\log_{10}(0.35)/(1+(\log_{10}(3.6e-30*(T/300)^{-4.1})*M/(1.9e-12*(T/300)^{0.2}))/0.75-1.27*\log_{10}(0.35)))@2))$                                                                                        |                     |
| NO + O3 → NO2 + O2   | $1.8E-11*\exp(110/T)$                                                                                                                                                                                                                                                                                                  |                     |
| NO2 + O3 → NO3 + O2  | $1.4E-13 * \exp(-2470/T)$                                                                                                                                                                                                                                                                                              |                     |
| NO + O3 → NO2 + O2   | $2.07E-12 * \exp(-1400/T)$                                                                                                                                                                                                                                                                                             |                     |
| NO3 + CO →           | 4E-19                                                                                                                                                                                                                                                                                                                  | Hjorth et al., 1986 |
| OH + NO2 → HNO3      | $((3.2e-30*(T/300)^{-4.5})*M*(3.0e-11))/((3.2e-30*(T/300)^{-4.5})*M+(3.0e-11))*10@(\log_{10}(0.41)/(1+(\log_{10}((3.2e-30*(T/300)^{-4.5})*M/(3.0e-11))/0.75-1.27*\log_{10}(0.41)))@2))$                                                                                                                                |                     |
| OH + NO3 → HO2 + NO2 | 2E-11                                                                                                                                                                                                                                                                                                                  |                     |
| HO2 + NO3 → OH + NO2 | 4E-12                                                                                                                                                                                                                                                                                                                  |                     |
| OH + NO → HONO       | $((7.4e-31*(T/300)^{-2.4})*M*(3.3e-11*(T/300)^{-0.3}))/((7.4e-31*(T/300)^{-2.4})*M+(3.3e-11*(T/300)^{-0.3})*10@(\log_{10}(0.81)/(1+(\log_{10}((7.4e-31*(T/300)^{-2.4})*M/(3.3e-11*(T/300)^{-0.3}))/0.75-1.27*\log_{10}(0.81)))@2))$                                                                                    |                     |
| HO2 + NO → OH + NO2  | $3.45E-12*\exp(270/T)$                                                                                                                                                                                                                                                                                                 |                     |
| HO2 + NO2 → HO2NO2   | $((1.4e-31*(T/300)^{-3.1})*M*(4.0e-12))/((1.4e-31*(T/300)^{-3.1})*M+(4.0e-12))*10@(\log_{10}(0.4)/(1+(\log_{10}((1.4e-31*(T/300)^{-3.1})*M/(4.0e-12))/0.75-1.27*\log_{10}(0.4)))@2))$                                                                                                                                  |                     |
| HO2NO2 + OH → NO2    | $3.2e-13*EXP(690/T)$                                                                                                                                                                                                                                                                                                   |                     |
| HO2NO2 → HO2 + NO2   | $((4.1e-5*\exp(-10650/T))*M*(6.0e15*\exp(-11170/T)))/((4.1e-5*\exp(-10650/T))*M+(6.0e15*\exp(-11170/T))*10@(\log_{10}(0.4)/(1+(\log_{10}((4.1e-5*\exp(-10650/T))*M/(6.0e15*\exp(-11170/T))))/0.75-1.27*\log_{10}(0.4)))@2))$                                                                                           |                     |

|                                                 |                                                                                                        |             |
|-------------------------------------------------|--------------------------------------------------------------------------------------------------------|-------------|
| OH + HONO → NO2                                 | 2.5e-12*EXP(260/T)                                                                                     |             |
| OH + HNO3 → NO3                                 | 2.40E-14*EXP(460/T) + ((6.50E-34*EXP(1335/T)*M)/<br>(1+(6.50E-34*EXP(1335/T)*M/2.70E-17*EXP(2199/T)))) |             |
| <b>HOx chemistry</b>                            |                                                                                                        |             |
| OH + O3 → HO2                                   | 1.70E-12*EXP(-940/T)                                                                                   |             |
| HO2 + O3 → OH                                   | 2.03E-16*(T/300)^4.57*EXP(693/T)                                                                       |             |
| OH + HO2 →                                      | 4.8E-11*EXP(250/T)                                                                                     |             |
| HO2 + HO2 → H2O2                                | 2.20E-13*(1+(1.40E-21*EXP(2200/T)*H2O))*EXP(600/T)                                                     |             |
| OH + H2O2 → HO2                                 | 2.9E-12*exp(-160/T)                                                                                    |             |
| OH + CO → HO2                                   | 1.44E-13*(1+(M/4.2E19))                                                                                |             |
| <b>Primary oxidation of isoprene</b>            |                                                                                                        |             |
| NO3 + C5H8 → NISOPO2                            | 2.95E-12 * exp (-450/T)                                                                                | IUPAC, 2019 |
| O3 + C5H8 → CH2OOE + MACR                       | 0.3 * 1.03E-14 * exp (-1995/T)                                                                         |             |
| O3 + C5H8 → CH2OOE + MVK                        | 0.2 * 1.03E-14 * exp (-1995/T)                                                                         |             |
| O3 + C5H8 → HCHO + MACROOA                      | 0.3 * 1.03E-14 * exp (-1995/T)                                                                         |             |
| O3 + C5H8 → HCHO + MVKOOA                       | 0.2 * 1.03E-14 * exp (-1995/T)                                                                         |             |
| OH + C5H8 → CISOPA                              | 0.288*2.7E-11 * exp (390/T)                                                                            |             |
| OH + C5H8 → CISOPC                              | 0.238*2.7E-11 * exp (390/T)                                                                            |             |
| OH + C5H8 → ISOP34O2                            | 0.022*2.7E-11 * exp (390/T)                                                                            |             |
| OH + C5H8 → ME3BU3ECHO + HO2                    | 0.02*2.7E-11 * exp (390/T)                                                                             |             |
| OH + C5H8 → PE4E2CO + HO2                       | 0.042*2.7E-11 * exp (390/T)                                                                            |             |
| OH + C5H8 → TISOPA                              | 0.288*2.7E-11 * exp (390/T)                                                                            |             |
| OH + C5H8 → TISOPC                              | 0.102*2.7E-11 * exp (390/T)                                                                            |             |
| <b>Secondary oxidation<br/>(1st generation)</b> |                                                                                                        |             |
| NISOPO2 + HO2 → NISOPOOH                        | 0.706*2.91E-13 * EXP(1300/T)                                                                           |             |
| NISOPO2 + NO3 → NISOPO + NO2                    | 2.3E-12                                                                                                |             |
| NISOPO2 + RO2 → ISOPCNO3                        | 0.2*1.3E-12                                                                                            |             |
| NISOPO2 + RO2 → NC4CHO                          | 0.2*1.3E-12                                                                                            |             |
| NISOPO2 + RO2 → NISOPO                          | 0.6*1.3E-12                                                                                            |             |
| CH2OOE → CH2OO                                  | 0.22*1E6                                                                                               |             |
| CH2OOE → CO                                     | 0.51*1E6                                                                                               |             |
| CH2OOE → HO2 + CO + OH                          | 0.27*1E6                                                                                               |             |
| MACR + NO3 → MACO3 + HNO3                       | 3.4E-15                                                                                                |             |

|                                   |                           |  |
|-----------------------------------|---------------------------|--|
| MACR + O3 → HCHO + MGLYOOB        | 0.12*1.4E-15*EXP(-2100/T) |  |
| MACR + O3 → MGLYOX + CH2OOG       | 0.88*1.4E-15*EXP(-2100/T) |  |
| MACR + OH → MACO3                 | 0.45*8.0E-12*EXP(380/T)   |  |
| MACR + OH → MACRO2                | 0.47*8.0E-12*EXP(380/T)   |  |
| MACR + OH → MACROHO2              | 0.08*8.0E-12*EXP(380/T)   |  |
| MVK + O3 → MGLOOA + HCHO          | 0.5*8.5E-16*EXP(-1520/T)  |  |
| MVK + O3 → MGLYOX + CH2OOB        | 0.5*8.5E-16*EXP(-1520/T)  |  |
| MVK + OH → HVMKAO2                | 0.3*2.6E-12*EXP(610/T)    |  |
| MVK + OH → HVMKBO2                | 0.7*2.6E-12*EXP(610/T)    |  |
| HCHO + NO3 → HNO3 + CO + HO2      | 5.5E-16                   |  |
| HCHO + OH → HO2 + CO              | 5.4E-12 * exp (135/T)     |  |
| MACROOA → C3H6                    | 0.255*1E6                 |  |
| MACROOA → CH3CO3 + HCHO + HO2     | 0.255*1E6                 |  |
| MACROOA → MACROO                  | 0.22*1E6                  |  |
| MACROOA → OH + CO + CH3CO3 + HCHO | 0.27*1E6                  |  |
| MVKOOA → C3H6                     | 0.255*1E6                 |  |
| MVKOOA → CH3O2 + HCHO + CO + HO2  | 0.255*1E6                 |  |
| MVKOOA → MVKOO                    | 0.22*1E6                  |  |
| MVKOOA → OH + MVKO2               | 0.27*1E6                  |  |
| CISOPA + O2 → CISOPAO2            | 3.5E-12                   |  |
| CISOPA + O2 → ISOPBO2             | 3E-12                     |  |
| CISOPC + O2 → CISOPCO2            | 2E-12                     |  |
| CISOPC + O2 → ISOPDO2             | 3.5E-12                   |  |
| ISOP34O2 + HO2 → ISOP34OOH        | 2.91E-13 * EXP(1300/T)    |  |
| ISOP34O2 + NO3 → ISOP34O + NO2    | 2.3E-12                   |  |
| ISOP34O2 + RO2 → HC4CHO           | 0.1*2.65E-12              |  |
| ISOP34O2 + RO2 → ISOP34O          | 0.8*2.65E-12              |  |
| ISOP34O2 + RO2 → ISOPDOH          | 0.1*2.65E-12              |  |
| ME3BU3ECHO + NO3 → NC526O2        | 3.3E-13                   |  |

|                                                            |                           |  |
|------------------------------------------------------------|---------------------------|--|
| ME3BU3ECHO + O3 →<br>CH2OOC + CO2C3CHO                     | 0.33*1.6E-17              |  |
| ME3BU3ECHO + O3 → HCHO<br>+ CO2C3OOB                       | 0.67*1.6E-17              |  |
| ME3BU3ECHO + OH →<br>C530O2                                | 0.712*7.3E-11             |  |
| ME3BU3ECHO + OH →<br>ME3BU3ECO3                            | 0.288*7.3E-11             |  |
| PE4E2CO + NO3 → NC51O2                                     | 1.2E-14                   |  |
| PE4E2CO + O3 → CH2OOB +<br>CO2C3CHO                        | 0.43*1E-17                |  |
| PE4E2CO + O3 → HCHO +<br>CO2C3OOA                          | 0.57*1E-17                |  |
| PE4E2CO + OH → C51O2                                       | 2.71E-11                  |  |
| TISOPA + O2 → ISOPA02                                      | 2.5E-12*exp(-480/T)       |  |
| TISOPA + O2 → ISOPBO2                                      | 3E-12                     |  |
| TISOPC + O2 → ISOPCO2                                      | 2.5E-12*exp(-480/T)       |  |
| TISOPC + O2 → ISOPDO2                                      | 3.5E-12                   |  |
| <b>Secondary oxidation (2<sup>nd</sup><br/>generation)</b> |                           |  |
| NISOPOOH + OH → NC4CHO<br>+ OH                             | 1.03E-10                  |  |
| NISOPO + O2 → NC4CHO +<br>HO2                              | 2.50E-14*EXP(-300/T)      |  |
| ISOPCNO3 + OH → INCO2                                      | 1.12E-10                  |  |
| NC4CHO + NO3 → NC4CO3 +<br>HNO3                            | 4.25*1.4E-12*EXP(-1860/T) |  |
| NC4CHO + OH → C510O2                                       | 0.52*4.16E-11             |  |
| NC4CHO + OH → NC4CO3                                       | 0.48*4.16E-11             |  |
| NC4CHO + O3 → NOA +<br>GLYOOC                              | 0.5*2.4E-17               |  |
| NC4CHO + O3 → GLYOX +<br>NOA00A                            | 0.5*2.4E-17               |  |
| CH2OO + CO → HCHO                                          | 1.2E-15                   |  |
| CH2OO + NO2 → HCHO + NO3                                   | 1E-15                     |  |
| MACO3 + NO3 → CH3C2H2O2<br>+ NO2                           | 1.74 * 2.3E-12            |  |
| MACO3 + HO2 → CH3C2H2O2                                    | 0.44 * 5.2E-13*EXP(980/T) |  |
| MACO3 + HO2 →                                              | 0.66 5.2E-13*EXP(980/T)   |  |
| MACO3 + RO2 → CH3C2H2O2                                    | 0.7*1E-11                 |  |
| MACO3 + RO2 →                                              | 0.3*1E-11                 |  |

|                                   |                              |  |
|-----------------------------------|------------------------------|--|
| MGLYOOB → MGLYOO                  | 0.18*1E6                     |  |
| MGLYOOB → OH + CO + CH3CO3        | 0.82*1E6                     |  |
| MGLYOX + NO3 → CH3CO3 + CO + HNO3 | 2.4*1.4E-12*EXP(-1860/T)     |  |
| MGLYOX + OH → CH3CO3 + CO         | 1.9E-12*exp(575/T)           |  |
| CH2OOG → CH2OO                    | 0.37*1E6                     |  |
| CH2OOG → CO                       | 0.47*1E6                     |  |
| CH2OOG → HO2 + CO + OH            | 0.16*1E6                     |  |
| MACRO2 + HO2 → MACROOH            | 0.625*2.91E-13 * EXP(1300/T) |  |
| MACRO2 + NO3 → MACRO + NO2        | 2.3E-12                      |  |
| MACRO2 + RO2 → ACETOL             | 9.2E-14                      |  |
| MACROHO2 + HO2 → (MACROHOOH)      | 0.625*2.91E-13 * EXP(1300/T) |  |
| MACROHO2 + NO3 → MACROHO + NO2    | 2.3E-12                      |  |
| MACROHO2 + RO2 → (div)            | 1.4E-12                      |  |
| MGLOOA → CH3CHO                   | 0.2*1E6                      |  |
| MGLOOA → OH + CO + CH3CO3         | 0.36*1E6                     |  |
| MGLOOA → CH3CO3 + HCHO + HO2      | 0.2*1E6                      |  |
| MGLOOA → MGLOO                    | 0.24*1E6                     |  |
| CH2OOB → CH2OO                    | 0.24*1E6                     |  |
| CH2OOB → CO                       | 0.4*1E6                      |  |
| CH2OOB → HO2 + CO + OH            | 0.36*1E6                     |  |
| HMVKAO2 + HO2 → (HMKVAAOH)        | 0.625*2.91E-13 * EXP(1300/T) |  |
| HMVKAO2 + NO3 → NO2 + HMVKAO      | 2.3E-12                      |  |
| HMVKAO2 + RO2 → (div)             | 2E-12                        |  |
| HMVKBO2 + HO2 → (HMKVBOOH)        | 0.625*2.91E-13 * EXP(1300/T) |  |
| HMVKBO2 + NO3 → NO2 + HMVKBO      | 2.3E-12                      |  |
| HMVKBO2 + RO2 → (div)             | 8.8E-13                      |  |
| C3H6 + O3 → CH2OOB + CH3CHO       | 0.5*5.5E-15*EXP(-1880/T)     |  |

|                                |                                                                                                                                                                                                                  |  |
|--------------------------------|------------------------------------------------------------------------------------------------------------------------------------------------------------------------------------------------------------------|--|
| C3H6 + O3 → CH3CHOOA + HCHO    | 0.5*5.5E-15*EXP(-1880/T)                                                                                                                                                                                         |  |
| C3H6 + NO3 → PRONO3AO2         | 0.35*4.6E-13*EXP(-1155/T)                                                                                                                                                                                        |  |
| C3H6 + NO3 → PRONO3BO2         | 0.65*4.6E-13*EXP(-1155/T)                                                                                                                                                                                        |  |
| C3H6 + OH → HYPROPO2           | 0.87* ((8e-27*(T/300)^-3.5)*M*(3.0e-11*(T/300)^-1)/<br>((8e-27*(T/300)^-3.5)*M+(3.0e-11*(T/300)^-1))*<br>10@(log10(0.5)/(1+(log10((8e-27*(T/300)^-3.5)*M/<br>(3.0e-11*(T/300)^-1)))/(0.75-1.27*log10(0.5))))@2)) |  |
| C3H6 + OH → IPROPOLO2          | 0.13* ((8e-27*(T/300)^-3.5)*M*(3.0e-11*(T/300)^-1)/<br>((8e-27*(T/300)^-3.5)*M+(3.0e-11*(T/300)^-1))*<br>10@(log10(0.5)/(1+(log10((8e-27*(T/300)^-3.5)*M/<br>(3.0e-11*(T/300)^-1)))/(0.75-1.27*log10(0.5))))@2)) |  |
| CH3CO3 + HO2 → CH3CO2H + O3    | 5.2E-13*EXP(980/T)                                                                                                                                                                                               |  |
| CH3CO3 + NO3 → NO2 + CH3O2     | 4E-12                                                                                                                                                                                                            |  |
| CH3CO3 + RO2 → CH3CO2H         | 0.3*1E-11                                                                                                                                                                                                        |  |
| CH3CO3 + RO2 → CH3O2           | 0.7*1E-11                                                                                                                                                                                                        |  |
| MACROO + CO → MACR             | 1.2e-15                                                                                                                                                                                                          |  |
| MACROO + NO2 → MACR + NO3      | 1E-15                                                                                                                                                                                                            |  |
| CH3O2 + HO2 →                  | 3.8E-13*EXP(780/T)*(1-1/(1+498*EXP(-1160/T)))                                                                                                                                                                    |  |
| CH3O2 + HO2 → HCHO             | 3.8E-13*EXP(780/T)*(1/(1+498*EXP(-1160/T)))                                                                                                                                                                      |  |
| CH3O2 + NO3 → CH3O + NO2       | 1.2E-12                                                                                                                                                                                                          |  |
| CH3O2 + RO2 → CH3OH            | 0.5* 2*1.03E-13*EXP(365/T)*0.5*(1-7.18*EXP(-885/T))                                                                                                                                                              |  |
| CH3O2 + RO2 → HCHO             | 0.5* 2*1.03E-13*EXP(365/T)*0.5*(1-7.18*EXP(-885/T))                                                                                                                                                              |  |
| MVKOO + CO → MVK               | 1.2E-15                                                                                                                                                                                                          |  |
| MVKOO + NO2 → MVK + NO3        | 1E-15                                                                                                                                                                                                            |  |
| MVKO2 + HO2 → (MVKOOH)         | 0.625*2.91E-13 * EXP(1300/T)                                                                                                                                                                                     |  |
| MVKO2 + NO3 → NO2              | 2.3E-12                                                                                                                                                                                                          |  |
| MVKO2 + RO2 → (div)            | 2E-12                                                                                                                                                                                                            |  |
| CISOPAO2 + HO2 → ISOPAOOH      | 0.706*2.91E-13 * EXP(1300/T)                                                                                                                                                                                     |  |
| CISOPAO2 + NO3 → CISOPAO + NO2 | 2.3E-12                                                                                                                                                                                                          |  |
| CISOPAO2 → C536O2              | 0.5*2.20E10*EXP(-8174/T)*EXP(1.00E8/T@3)                                                                                                                                                                         |  |
| CISOPAO2 → C5HPALD1 + HO2      | 0.5*2.20E10*EXP(-8174/T)*EXP(1.00E8/T@3)                                                                                                                                                                         |  |
| CISOPAO2 → CISOPA              | 5.22E15*EXP(-9838/T)                                                                                                                                                                                             |  |
| CISOPAO2 + RO2 → CISOPAO       | 0.8*2.4E-12                                                                                                                                                                                                      |  |

|                                  |                                          |  |
|----------------------------------|------------------------------------------|--|
| CISOPAO2 + RO2 → HC4ACHO         | 0.1*2.4E-12                              |  |
| CISOPAO2 + RO2 → ISOPA0H         | 0.1*2.4E-12                              |  |
| ISOPBO2 + HO2 → ISOPBOOH         | 0.706*2.91E-13 * EXP(1300/T)             |  |
| ISOPBO2 + NO3 → ISOPBO + NO2     | 2.3E-12                                  |  |
| ISOPBO2 + RO2 → ISOPBO           | 0.8*8E-13                                |  |
| ISOPBO2 + RO2 → ISOPBOH          | 0.2*8E-13                                |  |
| CISOPCO2 + HO2 → ISOPCOOH        | 0.706*2.91E-13 * EXP(1300/T)             |  |
| CISOPCO2 + NO3 → CISOPCO + NO2   | 2.3E-12                                  |  |
| CISOPCO2 → C537O2                | 0.5*2.20E10*EXP(-8174/T)*EXP(1.00E8/T@3) |  |
| CISOPCO2 → C5HPALD2 + HO2        | 0.5*2.20E10*EXP(-8174/T)*EXP(1.00E8/T@3) |  |
| CISOPCO2 → CISOPC                | 3.06E15*EXP(-10254/T)                    |  |
| CISOPCO2 + RO2 → CISOPCO         | 0.8*2E-12                                |  |
| CISOPCO2 + RO2 → HC4CCHO         | 0.2*2E-12                                |  |
| CISOPCO2 + RO2 → ISOPA0H         | 0.2*2E-12                                |  |
| ISOPDO2 + HO2 → ISOPDOOH         | 0.706*2.91E-13 * EXP(1300/T)             |  |
| ISOPDO2 + NO3 → ISOPDO + NO2     | 2.3E-12                                  |  |
| ISOPDO2 + RO2 → ISOPDO           | 0.8*2.9E-12                              |  |
| ISOPDO2 + RO2 → HCOC5            | 0.1*2.9E-12                              |  |
| ISOPDO2 + RO2 → ISOPDOH          | 0.1*2.9E-12                              |  |
| ISOP34OOH + OH → HC4CHO + OH     | 9.73E-11                                 |  |
| ISOP34O → MACR + HCHO + HO2      | 1E6                                      |  |
| HC4CHO + OH → C58O2              | 0.829*1.04E-10                           |  |
| HC4CHO + OH → HC4CO3             | 0.171*1.04E-10                           |  |
| ISOPDOH + OH → HCOC5 + HO2       | 7.38E-11                                 |  |
| NC526O2 + NO3 → NO2 +            | 2.3E-12                                  |  |
| NC526O2 + RO2 →                  | 9.20E-14                                 |  |
| CH2OOC → CH2OO                   | 0.18*1E6                                 |  |
| CH2OOC → HO2 + CO+ OH            | 0.82*1E6                                 |  |
| CO2C3CHO + NO3 → HNO3 + CO2C3CO3 | 4* 1.4E-12*EXP(-1860/T)                  |  |



|                                                              |                              |  |
|--------------------------------------------------------------|------------------------------|--|
| CO2C3CHO + OH →<br>CO2C3CO3                                  | 7.15E-11                     |  |
| CO2C3OOB → C4CO2O2 + OH                                      | 0.82*1E6                     |  |
| CO2C3OOB → CO2C3OO                                           | 0.18*1E6                     |  |
| C530O2 + HO2 →                                               | 0.706*2.91E-13 * EXP(1300/T) |  |
| C530O2 + NO3 → NO2 +                                         | 2.3E-12                      |  |
| C530O2 + RO2 →                                               | 9.2E-14                      |  |
| ME3BU3ECO3 + HO2 →<br>C45O2 + OH + NO2                       | 0.44*1.4E-12*EXP(-1860/T)    |  |
| ME3BU3ECO3 + HO2 →                                           | 0.56*2.91E-13 * EXP(1300/T)  |  |
| ME3BU3ECO + NO3 → C45O2<br>+ NO2                             | 1.6*2.3E-12                  |  |
| ME3BU3ECO3 + RO2 → C45O2                                     | 1E-11                        |  |
| NC510O2 + HO2 →                                              | 0.625*2.91E-13 * EXP(1300/T) |  |
| NC510O2 + NO3 → NO2 +                                        | 2.3E-12                      |  |
| NC510O2 + RO2 →                                              | 8.8E-12                      |  |
| CO2C3OOA → C4CO2O2 + OH                                      | 0.36*1E6                     |  |
| CO2C3OOA → CH2COCH2O2<br>+ HO2                               | 0.2*1E6                      |  |
| CO2C3OOA → CH2COCH3                                          | 0.2*1E6                      |  |
| CO2C3OOA → CO2C3OO                                           | 0.24*1E6                     |  |
| C51O2 + HO2 →                                                | 0.706*2.91E-13 * EXP(1300/T) |  |
| C51O2 + NO3 → NO2 +                                          | 2.3E-12                      |  |
| ISOPAO2 + HO2 → ISOPAOOH                                     | 0.706*2.91E-13 * EXP(1300/T) |  |
| ISOPAO2 + NO3 → NO2 +<br>ISOPAO                              | 2.3E-12                      |  |
| ISOPAO2 + RO2 → HC4ACHO                                      | 0.1*2.4E-12                  |  |
| ISOPAO2 + RO2 → ISOPAO                                       | 0.8*2.4E-12                  |  |
| ISOPAO2 + RO2 → ISOPAHO                                      | 0.1*2.4E-12                  |  |
| ISOPCO2 + HO2 → ISOPCOOH                                     | 0.706*2.91E-13 * EXP(1300/T) |  |
| ISOPCO2 + NO3 → NO2 +<br>ISOPCO                              | 2.3E-12                      |  |
| ISOPCO2 + RO2 → HC4CCHO                                      | 0.1*2E-12                    |  |
| ISOPCO2 + RO2 → ISOPAHO                                      | 0.1*2E-12                    |  |
| ISOPCO2 + RO2 → ISOPCO                                       | 0.8*2E12                     |  |
| <b>Secondary oxidation (3<sup>rd</sup> +<br/>generation)</b> |                              |  |
| INCO2 + HO2 →                                                | 0.706*2.91E-13 * EXP(1300/T) |  |
| INCO2 + NO3 → NO2 +                                          | 2.3E-12                      |  |
| INCO2 + RO2 →                                                | 2.9E-12                      |  |

|                                        |                              |  |
|----------------------------------------|------------------------------|--|
| NC4CO3 + HO2 → NOA + CO+<br>HO2 + OH   | 0.44*5.2E-13*EXP(980/T)      |  |
| NC4CO3 + HO2 →                         | 0.66*5.2E-13*EXP(980/T)      |  |
| NC4CO3 + NO3 → NOA + CO +<br>HO2 + NO2 | 1.74*2.3E-12                 |  |
| NC4CO3 + RO2 →                         | 0.3*1E-11                    |  |
| NC4CO3 + RO2 → NOA + HO2<br>+ CO       | 0.7*1E-11                    |  |
| NOA + OH → MGLYOX + NO2                | 1.3E-13                      |  |
| C510O2 + HO2 →                         | 0.706*2.91E-13 * EXP(1300/T) |  |
| C510O2 + NO3 → NO2                     | 2.3E-12                      |  |
| C510O2 + RO2 →                         | 9.2E-14                      |  |
| GLYOOC → GLYOO                         | 0.11*1E6                     |  |
| GLYOOC → OH + HO2 + CO +<br>CO         | 0.89*1E6                     |  |
| GLYOO + NO2 → GLYOX +<br>NO3           | 1E-15                        |  |
| NOA00A → NOA0O                         | 0.11*1E6                     |  |
| NOA00A → OH + NO2 +<br>MGLYOX          | 0.89*1E6                     |  |
| NOA0O + NO2 → NOA + NO3                | 1E-15                        |  |
| CH3C2H2O2 → CH3CO3 +<br>HCHO           | 0.35*1E6                     |  |
| CH3C2H2O2 → HCHO +<br>CH3O2 + CO       | 0.65*1E6                     |  |
| MGLYOO + NO2 → MGLYOX<br>+ NO3         | 1E-15                        |  |
| MACROOH + OH → ACETOL<br>+ CO + OH     | 3.77E-11                     |  |
| MACRO → ACETOL + CO+<br>HO2            | 1E6                          |  |
| MACROHO → MGLYOX +<br>HCHO + HO2       | 1E6                          |  |
| MGLOO + NO2 → MGLYOX +<br>NO3          | 1E-15                        |  |
| HMVKAO → MGLYOX +<br>HCHO + HO2        | 1E6                          |  |
| HMVKBO → CH3CO3 +<br>HOCH2CHO          | 1E6                          |  |
| CH3CHOOA → CH3CHOO                     | 0.24*1E6                     |  |

|                                |                              |  |
|--------------------------------|------------------------------|--|
| CH3CHOOA → CH3O2 + CO + OH     | 0.36*1E6                     |  |
| CH3CHOOA → CH3O2 + HO2         | 0.2*1E6                      |  |
| CH3CHOOA →                     | 0.2*1E6                      |  |
| CH3CHOO + CO → CH3CHO          | 1.2E-15                      |  |
| CH3CHOO + NO2 → CH3CHO + NO3   | 1E-15                        |  |
| PRONO3AO2 + HO2 →              | 0.520*2.91E-13 * EXP(1300/T) |  |
| PRONO3AO2 + NO3 → NO2 +        | 2.3E-12                      |  |
| PRONO3AO2 + RO2 →              | 0.2*6E-13                    |  |
| PRONO3BO2 + HO2 →              | 0.520*2.91E-13 * EXP(1300/T) |  |
| PRONO3BO2 + NO3 → NO2 +        | 2.3E-12                      |  |
| PRONO3BO2 + RO2 →              | 0.2*4E-14                    |  |
| HYPROPO2 + HO2 →               | 0.520*2.91E-13 * EXP(1300/T) |  |
| HYPROPO2 + NO3 → NO2 +         | 2.3E-12                      |  |
| HYPROPO2 + RO2 →               | 8.8E-13                      |  |
| IPROPOLO2 + HO2 →              | 0.520*2.91E-13 * EXP(1300/T) |  |
| IPROPOLO2 + NO3 → NO2 +        | 2.3E-12                      |  |
| IPROPOLO2 + RO2 →              | 2E-12                        |  |
| MVKOOH + OH → VGLYOX           | 2.55E-11                     |  |
| MVKOOH + OH → MVKO2            | 1.90E-12*EXP(190/T)          |  |
| VGLYOX + NO3 →                 | 2.0*1.4E-12*EXP(-1860/T)     |  |
| CH3CO2H + OH → CH3O2           | 8E-13                        |  |
| ISOPAOOH + OH → HC4ACHO        | 0.05*1.54E-10                |  |
| ISOPAOOH + OH → IEPOXA + OH    | 0.93*1.54E-10                |  |
| ISOPAOOH + OH → ISOPAO2        | 0.02*1.54E-10                |  |
| HC4ACHO + NO3 → HC4ACO3 + HNO3 | 4.25*1.4E-12*EXP(-1860/T)    |  |
| HC4ACHO + O3 → ACETOL + GLYOX  | 0.5*2.4E-17                  |  |
| HC4ACHO + O3 → CO +            | 0.5*2.4E-17                  |  |
| HC4ACHO + OH → C58O2           | 0.52*4.52E-11                |  |
| HC4ACHO + OH → HC4ACO3         | 0.49*4.52E-11                |  |
| C58O2 + HO2 →                  | 0.706*2.91E-13 * EXP(1300/T) |  |
| C58O2 + NO3 → NO2 +            | 2.3E-12                      |  |
| C58O2 + RO2 →                  | 9.2E-14                      |  |
| HC4ACO3 + HO2 →                | 5.2E-13*EXP(980/T)           |  |
| HC4ACO3 + NO3 → NO2 +          | 1.74*2.3E-12                 |  |
| HC4ACO3 + RO2 →                | 1E-11                        |  |

|                                   |                                      |  |
|-----------------------------------|--------------------------------------|--|
| HC4ACO3 → HO2 +                   | 2.20E10*EXP(-8174/T)*EXP(1.00E8/T@3) |  |
| CISOPAO → C526O2                  | 0.19*1E6                             |  |
| CISOPAO → HC4CCHO + HO2           | 0.63*1E6                             |  |
| CISOPAO → HO2 + M3F               | 0.18*1E6                             |  |
| C526O2 + HO2 →                    | 0.706*2.91E-13 * EXP(1300/T)         |  |
| C526O2 + NO3 → NO2 +              | 2.3E-12                              |  |
| C526O2 + RO2 →                    | 9.20E-14                             |  |
| C526O2 → CO + OH                  | 3.00E7*EXP(-5300/T)                  |  |
| M3F + NO3 → NO2 +                 | 1.9E-11                              |  |
| M3F + O3 →                        | 2E-17                                |  |
| M3F + OH → HO2 +                  | 9E-11                                |  |
| C536O2 + HO2 →                    | 0.706*2.91E-13 * EXP(1300/T)         |  |
| C536O2 + NO3 → NO2 +              | 2.3E-12                              |  |
| C536O2 + RO2 →                    | 9.20E-14                             |  |
| C536O2 → CO + OH                  | 3.00E7*EXP(-5300/T)                  |  |
| C5HPALD1 + NO3 → OH +<br>HNO3 +   | 4.25*1.4E-12*EXP(-1860/T)            |  |
| C5HPALD1 + O3 →<br>MGLYOOA        | 0.73*2.4E-17                         |  |
| C5HPALD1 + O3 → MGLYOX            | 0.27*2.4E-17                         |  |
| MGLYOOA → MGLYOO                  | 0.11*1E6                             |  |
| MGLYOOA → CH3CO3 + OH<br>+CO      | 0.89*1E6                             |  |
| C5HPALD1 + OH → OH +              | 5.2E-11                              |  |
| ISOPAOH + OH → HC4ACHO+<br>HO2    | 0.5*9.3E-11                          |  |
| ISOPAOH + OH → HC4CCHO<br>+ HO2   | 0.5*9.3E-11                          |  |
| HC4CCHO + NO3 → HC4CCO3<br>+ HNO3 | 4.25*1.4E-12*EXP(-1860/T)            |  |
| HC4CCHO + O3 →                    | 2.4E-17                              |  |
| HC4CCHO + OH → C57O2              | 0.52*4.52E-11                        |  |
| HC4CCHO + OH → HC4CCO3            | 0.48*4.52E-11                        |  |
| HC4CCO3 + HO2 →                   | 5.2E-13*EXP(980/T)                   |  |
| HC4CCO3 + NO3 → NO2 +             | 1.74*2.3E-12                         |  |
| HC4CCO3 + RO2 →                   | 1E-11                                |  |
| C57O2 + HO2 →                     | 0.706*2.91E-13 * EXP(1300/T)         |  |
| C57O2 + NO3 → NO2 +               | 2.3E-12                              |  |
| C57O2 + RO2 →                     | 9.20E-14                             |  |
| ISOPBOOH + OH → IEPOXB +<br>OH    | 0.92*5E-11                           |  |

|                               |                              |  |
|-------------------------------|------------------------------|--|
| ISOPBOOH + OH → ISOPBO2       | 0.08*5E-11                   |  |
| IEPOXB + OH → IEB1O2          | 0.5*9.05E-12                 |  |
| IEPOXB + OH → IEB2O2          | 0.5*9.05E-12                 |  |
| IEB1O2 + HO2 →                | 0.706*2.91E-13 * EXP(1300/T) |  |
| IEB1O2 + NO3 → NO2 +          | 2.3E-12                      |  |
| IEB1O2 + RO2 →                | 9.20E-14                     |  |
| IEB1O2 + HO2 →                | 0.706*2.91E-13 * EXP(1300/T) |  |
| IEB1O2 + NO3 → NO2 +          | 2.3E-12                      |  |
| IEB1O2 + RO2 →                | 8.8E-13                      |  |
| ISOPBO → MVK + HCHO + HO2     | 1E6                          |  |
| ISOPBOH + OH → ISOPBO         | 3.85E-11                     |  |
| ISOPCOOH + OH → HC4CCHO + OH  | 0.05*1.54E-10                |  |
| ISOPCOOH + OH → IEPOXC + OH   | 0.93*1.54E-10                |  |
| ISOPCOOH + OH → ISOPCO2       | 0.02*1.54E-10                |  |
| IEPOXC + OH → IEC1O2          | 0.719*1.5E-11                |  |
| IEPOXC + OH →                 | 0.281*1.5E-11                |  |
| IEC1O2 + HO2 →                | 0.706*2.91E-13 * EXP(1300/T) |  |
| IEC1O2 + NO3 → NO2 +          | 2.3E-12                      |  |
| IEC1O2 + RO2 →                | 9.2E-14                      |  |
| CISOPCO → C527O2              | 0.3*1E6                      |  |
| CISOPCO → HC4ACHO             | 0.52*1E6                     |  |
| CISOPCO → HO2 + M3F           | 0.18*1E6                     |  |
| C527O2 + HO2 →                | 0.706*2.91E-13 * EXP(1300/T) |  |
| C527O2 + NO3 → NO2 +          | 2.3E-12                      |  |
| C527O2 + RO2 →                | 8.8E-13                      |  |
| C527O2 → CO + OH              | 3.00E7*EXP(-5300/T)          |  |
| C537O2 + HO2 →                | 0.706*2.91E-13 * EXP(1300/T) |  |
| C537O2 + NO3 → NO2 +          | 2.3E-12                      |  |
| C537O2 + RO2 →                | 9.2E-14                      |  |
| C537O2 → CO + OH              | 3.00E7*EXP(-5300/T)          |  |
| C5HPALD2 + NO3 → OH + HNO3 +  | 4.25*1.4E-12*EXP(-1860/T)    |  |
| C5HPALD2 + O3 → MGLYOOC       | 0.73*2.4E-17                 |  |
| C5HPALD2 + O3 → MGLYOX        | 0.27*2.4E-17                 |  |
| C5HPALD2 + OH → OH            | 5.2E-11                      |  |
| ISOPAHOH + OH → HC4ACHO + HO2 | 0.5*9.3E-11                  |  |

|                                                                                                                                       |                              |  |
|---------------------------------------------------------------------------------------------------------------------------------------|------------------------------|--|
| ISOPA <sub>2</sub> OH + OH → HC <sub>4</sub> CCHO + HO <sub>2</sub>                                                                   | 0.5*9.3E-11                  |  |
| ISOPDOOH + OH → HCOC <sub>5</sub> + OH                                                                                                | 0.22*1.15E-10                |  |
| ISOPDOOH + OH → IEPOXB + OH                                                                                                           | 0.75*1.15E-10                |  |
| ISOPDOOH + ISOPDO <sub>2</sub>                                                                                                        | 0.03*1.15E-10                |  |
| OH + HCOC <sub>5</sub> → C <sub>5</sub> O <sub>2</sub>                                                                                | 3.81E-11                     |  |
| C <sub>5</sub> O <sub>2</sub> + HO <sub>2</sub> →                                                                                     | 0.706*2.91E-13 * EXP(1300/T) |  |
| C <sub>5</sub> O <sub>2</sub> + NO <sub>3</sub> → NO <sub>2</sub> +                                                                   | 2.3E-12                      |  |
| C <sub>5</sub> O <sub>2</sub> + RO <sub>2</sub> →                                                                                     | 9.2E-14                      |  |
| ISOPDO → MACR + HCHO + HO <sub>2</sub>                                                                                                | 1E6                          |  |
| ISOPDOH + OH → HCOC <sub>5</sub>                                                                                                      | 7.38E-11                     |  |
| HC <sub>4</sub> CO <sub>3</sub> + HO <sub>2</sub> →                                                                                   | 0.56*2.91E-13 * EXP(1300/T)  |  |
| HC <sub>4</sub> CO <sub>3</sub> + HO <sub>2</sub> → MACR + HO <sub>2</sub> + OH                                                       | 0.44*2.91E-13 * EXP(1300/T)  |  |
| HC <sub>4</sub> CO <sub>3</sub> + NO <sub>3</sub> → MACR + HO <sub>2</sub> + NO <sub>2</sub>                                          | 1.5*2.3E-12                  |  |
| HC <sub>4</sub> CO <sub>3</sub> → MACR + HO <sub>2</sub>                                                                              | 1E-11                        |  |
| CO <sub>2</sub> C <sub>3</sub> CO <sub>3</sub> + HO <sub>2</sub> → CH <sub>3</sub> COCH <sub>2</sub> O <sub>2</sub>                   | 0.44*2.91E-13 * EXP(1300/T)  |  |
| CO <sub>2</sub> C <sub>3</sub> CO <sub>3</sub> + HO <sub>2</sub> →                                                                    | 0.56*2.91E-13 * EXP(1300/T)  |  |
| CO <sub>2</sub> C <sub>3</sub> CO <sub>3</sub> + NO <sub>3</sub> → CH <sub>3</sub> COCH <sub>2</sub> O <sub>2</sub> + NO <sub>2</sub> | 1.74*2.3E-12                 |  |
| CO <sub>2</sub> C <sub>3</sub> CO <sub>3</sub> → CH <sub>3</sub> COCH <sub>2</sub> O <sub>2</sub>                                     | 1E-11                        |  |
| CH <sub>3</sub> COCH <sub>2</sub> O <sub>2</sub> + HO <sub>2</sub> → OH +                                                             | 0.15*1.36E-13*EXP(1250/T)    |  |
| CH <sub>3</sub> COCH <sub>2</sub> O <sub>2</sub> + HO <sub>2</sub> →                                                                  | 0.85*1.36E-13*EXP(1250/T)    |  |
| CH <sub>3</sub> COCH <sub>2</sub> O <sub>2</sub> + NO <sub>3</sub> → NO <sub>2</sub> +                                                | 2.3E-12                      |  |
| CH <sub>3</sub> COCH <sub>2</sub> O <sub>2</sub> + RO <sub>2</sub> → ACETOL                                                           | 0.2* 2*(3.5E-13*8E-12)@0.5   |  |
| CH <sub>3</sub> COCH <sub>2</sub> O <sub>2</sub> + RO <sub>2</sub> →                                                                  | 0.6* 2*(3.5E-13*8E-12)@0.5   |  |
| CH <sub>3</sub> COCH <sub>2</sub> O <sub>2</sub> + RO <sub>2</sub> → MGLYOX                                                           | 0.2* 2*(3.5E-13*8E-12)@0.5   |  |
| CO <sub>2</sub> C <sub>3</sub> O <sub>0</sub> + CO →                                                                                  | 1.2E-15                      |  |
| CO <sub>2</sub> C <sub>3</sub> O <sub>0</sub> + NO <sub>2</sub> → NO <sub>3</sub> +                                                   | 1E-15                        |  |
| C <sub>4</sub> CO <sub>2</sub> O <sub>2</sub> + HO <sub>2</sub> →                                                                     | 0.625*2.91E-13 * EXP(1300/T) |  |
| C <sub>4</sub> CO <sub>2</sub> O <sub>2</sub> + NO <sub>3</sub> → NO <sub>2</sub> +                                                   | 2.3E-12                      |  |
| C <sub>4</sub> CO <sub>2</sub> O <sub>2</sub> + RO <sub>2</sub> →                                                                     | 8.8E-12                      |  |
| C <sub>4</sub> O <sub>2</sub> + HO <sub>2</sub> →                                                                                     | 0.625*2.91E-13 * EXP(1300/T) |  |
| C <sub>4</sub> O <sub>2</sub> + NO <sub>3</sub> → NO <sub>2</sub> +                                                                   | 2.3E-12                      |  |

|                              |                                                                                                                                                                                                                                                                                                                                                                                                                                                  |                                                                                                                            |
|------------------------------|--------------------------------------------------------------------------------------------------------------------------------------------------------------------------------------------------------------------------------------------------------------------------------------------------------------------------------------------------------------------------------------------------------------------------------------------------|----------------------------------------------------------------------------------------------------------------------------|
| C45O2 + RO2 →                | 1.3E-12                                                                                                                                                                                                                                                                                                                                                                                                                                          |                                                                                                                            |
| ISOPAO → C524O2              | 0.25*1E6                                                                                                                                                                                                                                                                                                                                                                                                                                         |                                                                                                                            |
| ISOPAO → HC4CHO + HO2        | 0.75*1E6                                                                                                                                                                                                                                                                                                                                                                                                                                         |                                                                                                                            |
| C524O2 + HO2 →               | 0.706*2.91E-13 * EXP(1300/T)                                                                                                                                                                                                                                                                                                                                                                                                                     |                                                                                                                            |
| C5242 + NO3 → NO2 +          | 2.3E-12                                                                                                                                                                                                                                                                                                                                                                                                                                          |                                                                                                                            |
| C5242 + RO2 →                | 2.9E-12                                                                                                                                                                                                                                                                                                                                                                                                                                          |                                                                                                                            |
| ISOPCOOH + OH → HC4CCHO + OH | 0.05*1.54E-10                                                                                                                                                                                                                                                                                                                                                                                                                                    |                                                                                                                            |
| ISOPCOOH + OH → IEPOXC + OH  | 0.93*1.54E-10                                                                                                                                                                                                                                                                                                                                                                                                                                    |                                                                                                                            |
| ISOPCOOH + ISOPCO2           | 0.02*1.54E-10                                                                                                                                                                                                                                                                                                                                                                                                                                    |                                                                                                                            |
| ISOPCO → HC4ACHO + HO2       | 0.75*1E6                                                                                                                                                                                                                                                                                                                                                                                                                                         |                                                                                                                            |
| ISOPCO → HC4CCHO + HO2       | 0.25*1E6                                                                                                                                                                                                                                                                                                                                                                                                                                         |                                                                                                                            |
| <b>β-caryophyllene</b>       |                                                                                                                                                                                                                                                                                                                                                                                                                                                  | Jenkin et al., 2012                                                                                                        |
| BCARY + NO3 → NBCO2          | 1.9E-11                                                                                                                                                                                                                                                                                                                                                                                                                                          |                                                                                                                            |
| NBCO2 + NO3 →                | 2.3E-12                                                                                                                                                                                                                                                                                                                                                                                                                                          |                                                                                                                            |
| BCARY + O3 → BCAOO           | 0.435*1.2E-14                                                                                                                                                                                                                                                                                                                                                                                                                                    |                                                                                                                            |
| BCARY + O3 → BCBOO           | 0.435*1.2E-14                                                                                                                                                                                                                                                                                                                                                                                                                                    |                                                                                                                            |
| BCARY + O3 →                 | 0.13*1.2E-14                                                                                                                                                                                                                                                                                                                                                                                                                                     |                                                                                                                            |
| BCAOO → BCSOZ                | 8E1                                                                                                                                                                                                                                                                                                                                                                                                                                              |                                                                                                                            |
| BCBOO → BCSOZ                | 1.2E2                                                                                                                                                                                                                                                                                                                                                                                                                                            |                                                                                                                            |
| <b>SAPHIR chamber</b>        |                                                                                                                                                                                                                                                                                                                                                                                                                                                  |                                                                                                                            |
| Y + OH → HO2                 | 1.44E-13*(1+(M/4.2E19))                                                                                                                                                                                                                                                                                                                                                                                                                          | OH background reactivity; behaving like CO (Fuchs et al., 2013)                                                            |
| Z + wall →                   | 3.86E-6                                                                                                                                                                                                                                                                                                                                                                                                                                          | Wall loss for O <sub>3</sub> , H <sub>2</sub> O <sub>2</sub> , HO <sub>2</sub> , HONO and HNO <sub>3</sub> (Richter, 2007) |
| NO3 + wall →                 | 1.6E-3                                                                                                                                                                                                                                                                                                                                                                                                                                           | Wall loss NO <sub>3</sub>                                                                                                  |
| N2O5 + wall →                | 3.3E-4                                                                                                                                                                                                                                                                                                                                                                                                                                           | Wall loss N <sub>2</sub> O <sub>5</sub>                                                                                    |
| <b>Definitions</b>           |                                                                                                                                                                                                                                                                                                                                                                                                                                                  |                                                                                                                            |
| RO2                          | NISOPO2 + ISOP34O2 + CH3C2H2O2 + MACO3 + MACRO2 + MACROHO2 + CH3CO3 + HMVKAO2 + HMVKBO2 + CH3O2 + MVKO2 + CISOPAO2 + ISOPBO2 + CISOPCO2 + ISOPDO2 + NC526O2 + C530O2 + M3BU3ECO3 + C45O2 + NC51O2 + C51O2 + ISOPAO2 + ISOPCO2 + INCO2 + NC4CO3 + C510O2 + PRONO3AO2 + PRONO3BO2 + HYPROPO2 + IPROPOLO2 + C536O2 + C537O2 + INAO2 + C58O2 + HC4CO3 + CO2C3CO3 + CH3COCH2O2 + C4CO2O2 + C527O2 + C526O2 + HC4ACO3 HC4CCO3 + C57O2 + C59O2 + C524O2 | organic peroxides                                                                                                          |
| kNO3_all                     | C5H8*2.95E-12*exp(450/T) + BCARY*1.9E-11 + C3H6*4.6E-13*exp(-1155/T) + (2.3E-12*(NISOPO2 + ISOPAO2 +                                                                                                                                                                                                                                                                                                                                             | overall NO <sub>3</sub> reactivity                                                                                         |

|             |                                                                                                                                                                                                                                                                                                                                                                                                                                                                                                                                                                                                                                                                                                                                                                                                                                                                                                       |                                                                                        |
|-------------|-------------------------------------------------------------------------------------------------------------------------------------------------------------------------------------------------------------------------------------------------------------------------------------------------------------------------------------------------------------------------------------------------------------------------------------------------------------------------------------------------------------------------------------------------------------------------------------------------------------------------------------------------------------------------------------------------------------------------------------------------------------------------------------------------------------------------------------------------------------------------------------------------------|----------------------------------------------------------------------------------------|
|             | <p>ISOPBO2 + ISOPCO2 + ISOPDO2 + CH3C2H2O2 + MACO3 +<br/> MACRO2 + MACROHO2 + HMKAO2 + HMKBO2 +<br/> MVKO2 + INCO2 + CISOPAO + CISOPAO2 + (NC4CO3*1.74)<br/> + C510O2 + NBCO2 + PRONO3AO2 + PRONO3BO2 +<br/> HYPROPO2 + IPROPOLO2 + INAO2 + C524O2 +<br/> (HC4ACO3*1.74) + (1.6*HC4CO3) + C58O2 + INB1O2 +<br/> (HC4CCO3*2.74) + INDO2 + C57O2 + C59O2 + C51O2 +<br/> IEB1O2 + IEB2O2 + IEC1O2 + ISOP34O2 + CISOPCO2 +<br/> NC526O2 + C527O2 + C526O2 + C536O2 + C537O2 + C530O2<br/> + C45O2 + 1.6*M3BU3ECO3 + INB2O2 + NC51O2 +<br/> 1.74*CO2C3CO3 + CH3COCH2O2 + C4CO2O2)) + (4E-<br/> 12*CH3CO3) +<br/> (1.2E-12*CH3O2) + (HO2*4E-12) + (5.5E-16*HCHO) + (4E-<br/> 19*CO) + 1.4E-12*EXP(-1860/T)*(NC4CHO*4.25 +<br/> HC4ACHO*4.25 + HC4CCHO*4.25 + 2.4*MGLYOX +<br/> 4*CO2C3CHO + 4.25*C5HPALD1 + 4.25*C5HPALD2<br/> +2*VGLYOX) + 3.3E-13*ME3BU3ECHO + (M3F*1.9E-11) +<br/> (1.2E-14*PE4E2CO)</p> |                                                                                        |
| kNO3_stable | <p>C5H8*2.95E-12*exp(450/T) + BCARY*1.9E-11 + C3H6*4.6E-<br/> 13*exp(-1155/T) + (5.5E-16*HCHO) + (4E-19*CO) + 1.4E-<br/> 12*EXP(-1860/T)*(NC4CHO*4.25 + HC4ACHO*4.25 +<br/> HC4CCHO*4.25 + 2.4*MGLYOX + 4*CO2C3CHO +<br/> 4.25*C5HPALD1 + 4.25*C5HPALD2 +2*VGLYOX) + 3.3E-<br/> 13*ME3BU3ECHO + (M3F*1.9E-11) + (1.2E-14*PE4E2CO)</p>                                                                                                                                                                                                                                                                                                                                                                                                                                                                                                                                                                 | NO <sub>3</sub> reactivity measurable by FT-CRDS                                       |
| M           | <p>P*(3.24E16)*(298/T)</p>                                                                                                                                                                                                                                                                                                                                                                                                                                                                                                                                                                                                                                                                                                                                                                                                                                                                            | Total molecular concentration using measured pressure P in Torr and temperature T in K |

40

45



## Exemplary comparison of isoprene measurements

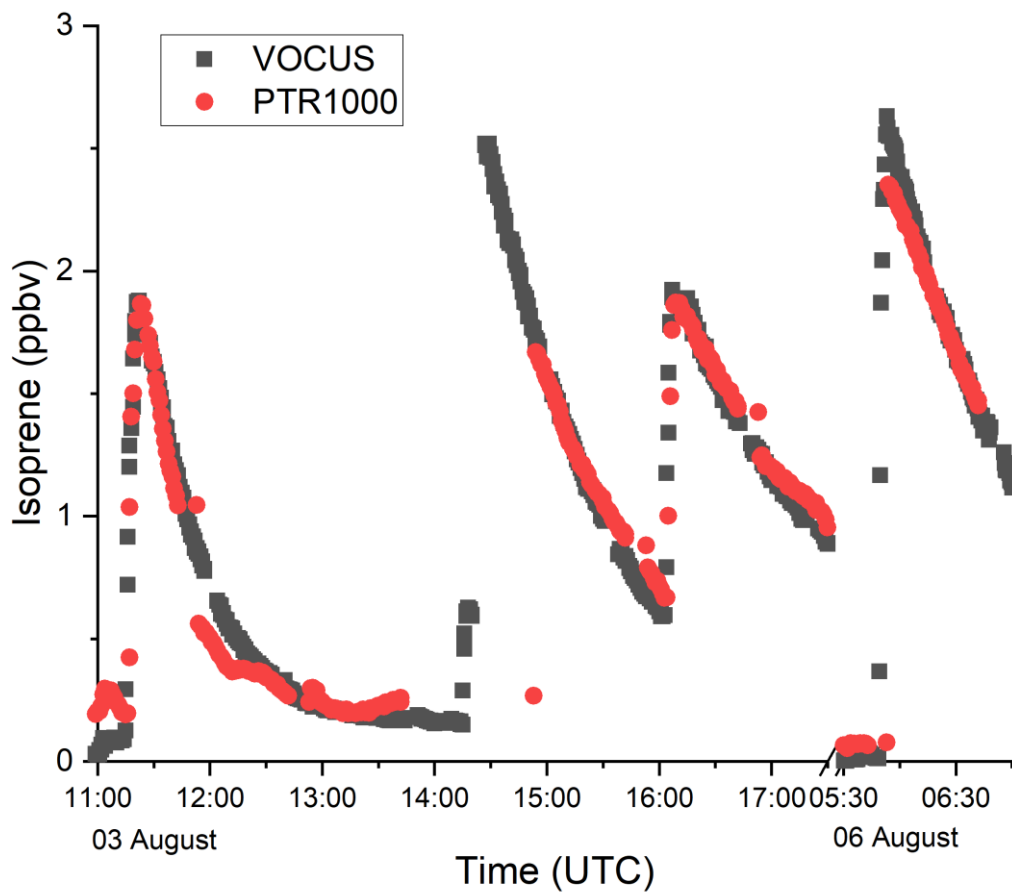

Figure S1: Amounts of isoprene during parts of the experiments on the 3<sup>rd</sup> and 6<sup>th</sup> August as measured by the two available PTR-ToF-MS instruments Vocus (black) and PTR1000 (red).

## 55 Comparison of $k^{OH}$ and $k^{NO_3}$

During NO3ISOP,  $k^{OH}$  was measured with an instrument based on laser photolysis – laser induced fluorescence (LP-LIF) (Hofzumahaus et al., 2009; Lou et al., 2010; Fuchs et al., 2017a; Fuchs et al., 2017b). Ambient air was passed at a flow rate of 19 L min<sup>-1</sup> through a flow tube and part of the air was drawn into an OH fluorescence detection cell. OH radicals were produced within a few nanoseconds in the flow tube by pulsed laser-photolysis of O<sub>3</sub> (at 266 nm) with subsequent reaction of O(<sup>1</sup>D) atoms with water vapour. OH concentration profiles were recorded by LIF, with  $k^{OH}$  determined from the exponential decay constant after correction for diffusion / wall loss ( $1.8 \pm 0.15$  s<sup>-1</sup>). The time resolution of the  $k^{OH}$  measurements was 90 s with a limit of detection of 0.5 s<sup>-1</sup>. The resulting accuracy of  $k^{OH}$  is (5-10) %  $\pm 0.2$  s<sup>-1</sup> at NO mixing ratios below 20 ppbv. Each isoprene injection results in an increase in reactivity of both OH and NO<sub>3</sub>. Within the first few minutes after an isoprene injection, the contribution of secondary oxidation products to both  $k^{NO_3}$  and  $k^{OH}$  is negligible. Hence, the increase in the OH- and NO<sub>3</sub> reactivity ( $\Delta k^{OH}$  and  $\Delta k^{NO_3}$ ) directly after an isoprene injection scales with the amount of isoprene injected and the corresponding rate coefficient ( $k_{NO_3+C_5H_8} = 6.5 \times 10^{-13}$  cm<sup>3</sup> molecule<sup>-1</sup> s<sup>-1</sup>,  $k_{OH+C_5H_8} = 1 \times 10^{-10}$  cm<sup>3</sup> molecule<sup>-1</sup> s<sup>-1</sup> at 298 K (IUPAC, 2019)). For any particular injection, both approaches should lead to similar isoprene concentrations as shown in Eq. S1.

$$[\text{Isoprene}] = \frac{\Delta k^{OH}}{k_{OH+C_5H_8}} = \frac{\Delta k^{NO_3}}{k_{NO_3+C_5H_8}} \quad (\text{S1})$$

70 Figure S2 plots the isoprene mixing ratios derived from measurements of  $\Delta k^{OH}$  versus those derived from  $\Delta k^{NO_3}$ . For experiments with isoprene mixing ratios below ~5 ppbv a slope of  $0.88 \pm 0.11$  was obtained. During two injections, when high concentrations of isoprene (~11 and ~22 ppbv) were injected in the chamber, the  $\Delta k^{OH}$  measurement returns isoprene mixing ratios that are significantly lower than those derived from  $\Delta k^{NO_3}$  and the mixing ratio expected from the amount of isoprene injected. On these days, a combination of the low laser power and a small number of points to fit the (rapid) exponential decay mean that the OH reactivity must be considered a lower-limit.

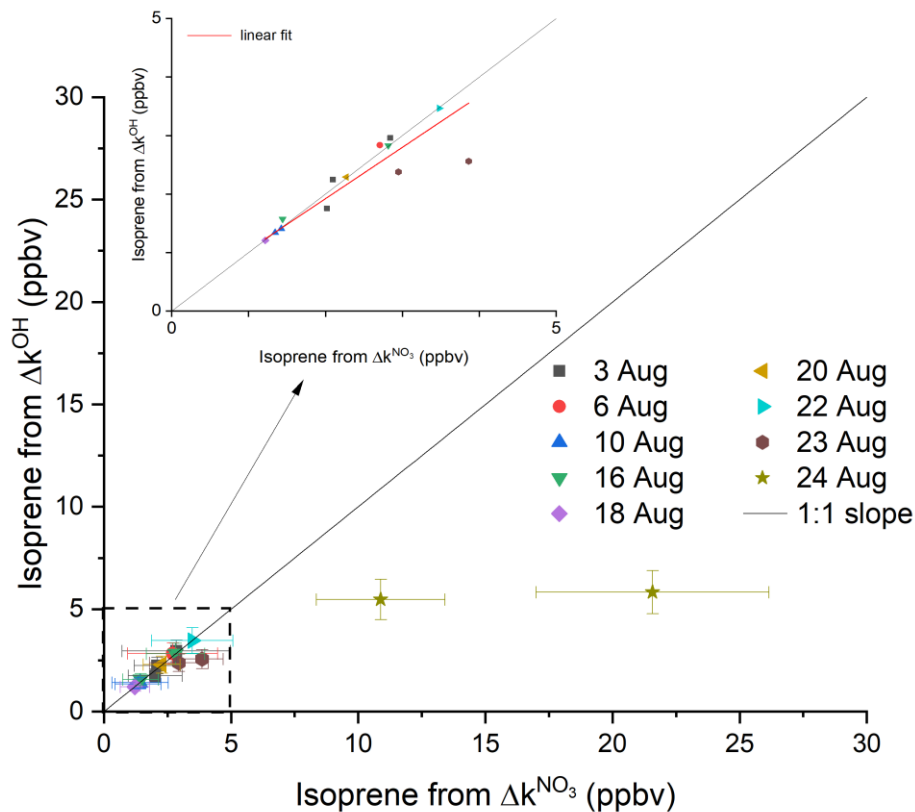

80 **Figure S2: Isoprene mixing ratios deduced from  $\Delta k^{OH}$  against those from  $\Delta k^{NO_3}$  under the usage of Eq. (S1) for isoprene injections of different experiments (days). The error bars denote the associated uncertainties in  $\Delta k^{NO_3}$  (4-70%, Liebmann et al., 2017) and  $k_{NO_3+C_5H_8}$  (41% (IUPAC, 2019)) and  $\Delta k^{OH}$  (10%, for [isoprene] < 5 ppbv) and  $k_{OH+C_5H_8}$  (15% (IUPAC, 2019)). The black line indicates the case of ideal 1:1 correlation, the red line shows an orthogonal linear regression (slope:  $0.88 \pm 0.11$ , intercept:  $0.17 \pm 0.23$ ) for data points < 5 ppbv.**

## Validity of the steady-state assumption

85 The validity of the steady-state assumption was checked with the help of a correlation plot between the steady-state ( $k_{SS}^{NO_3}$ ) and non-steady-state ( $k_{nss}^{NO_3}$ ) reactivity as depicted in Fig. S3a. A slope close to 1 is found for most of the experiments. At injection points of  $NO_2$  or at low reactivities larger differences are observed which are related to short-term perturbation of the equilibrium between  $NO_3$  and  $N_2O_5$  and deviation from steady-state.

90 Figure S3b compares  $k_{SS}^{NO_3}$  with  $k_{nss}^{NO_3}$  on the 2<sup>nd</sup> August. Between 9:00 and 11:00 UTC only  $NO_2$  and  $O_3$  were injected into chamber so that the influence of the chamber alone (reaction with the walls and the dilution flow) determines the  $NO_3$  losses. As the  $NO_3$  loss rate is low under these circumstances, nearly half an hour is necessary to achieve steady-state. This is confirmed by the difference between  $k_{nss}^{NO_3}$  and  $k_{SS}^{NO_3}$ . Under the experimental conditions, the equilibrium between  $NO_3$  and  $N_2O_5$  is reached more rapidly than the steady state (Brown et al., 2003). Consequently,  $k_{nss}^{NO_3}$  acquires a constant value earlier than  $k_{SS}^{NO_3}$ . A reinjection of  $NO_2$  at ~10:50 perturbs the stationary-state and therefore strongly affects  $k_{SS}^{NO_3}$  whereas  $k_{nss}^{NO_3}$  remains mostly unchanged. After the injection of isoprene the high  $NO_3$ -reactivity means that the steady-state assumption becomes valid, which leads to an agreement between the two methods.

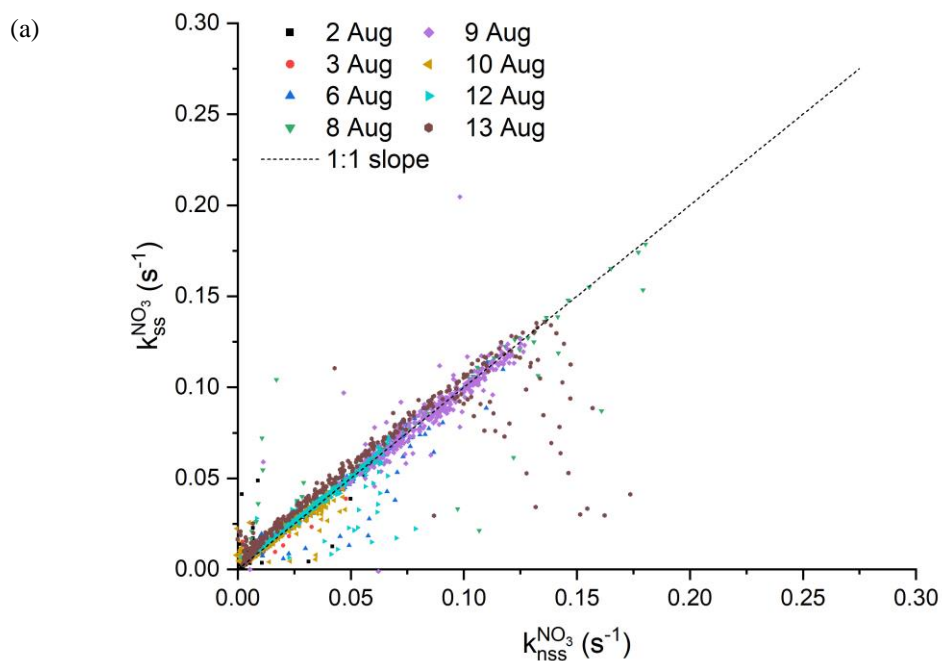

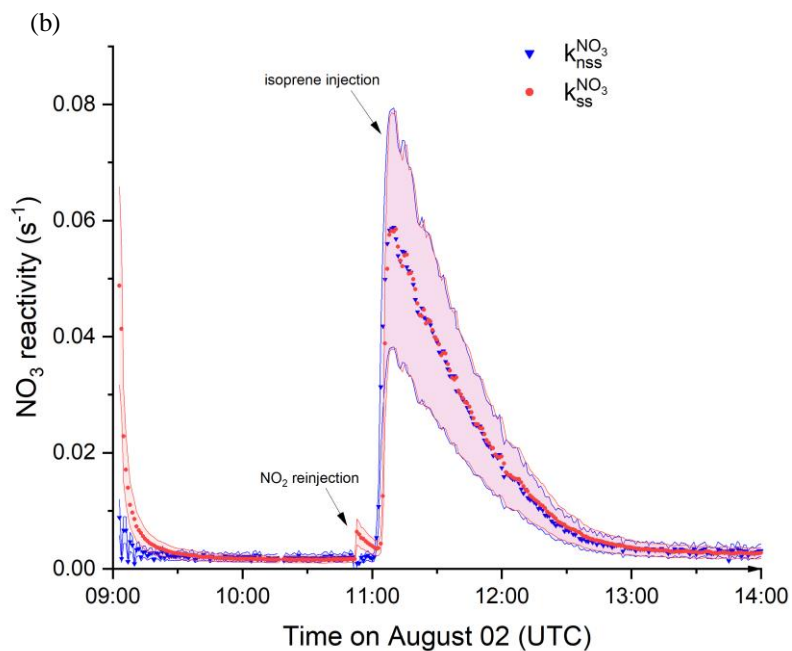

105 **Figure S3: (a) Steady-state  $k_{SS}^{NO_3}$  and non-steady-state  $k_{nss}^{NO_3}$  reactivities sorted by experiment. The dotted line through the origin with a slope of 1 represents perfect agreement. (b) Comparison between steady- (red) and non-steady-state (blue) reactivities on the experiment of the 2<sup>nd</sup> August. The respective uncertainties obtained from error propagation of the uncertainties in  $k_2$  (15%; IUPAC, 2019) and the  $NO_3$ ,  $NO_2$  and  $O_3$  mixing ratios (25%, 9% and 5%, respectively) are indicated by areas in the same colour of the data points.**

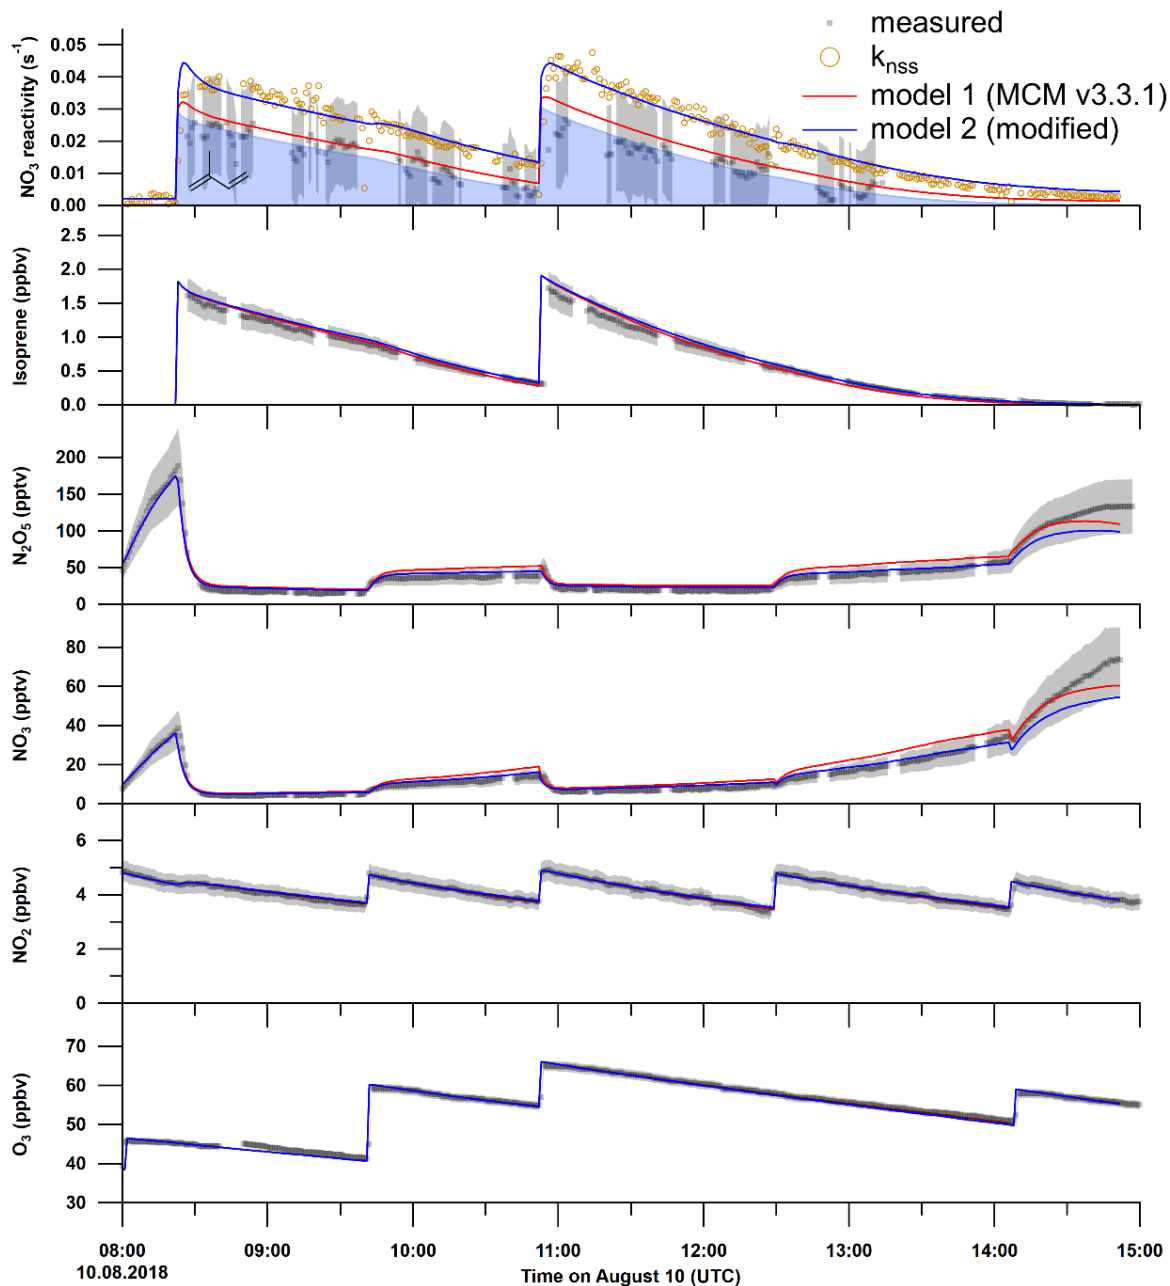

Figure S4: O<sub>3</sub>, NO<sub>2</sub>, NO<sub>3</sub>, N<sub>2</sub>O<sub>5</sub> and isoprene mixing ratios as well as the NO<sub>3</sub> reactivity on the experiment of the 10<sup>th</sup> August (black). The grey shaded area symbolizes the overall uncertainty associated with each measurement. Orange circles denote the non-steady-state reactivity obtained from Eq.(3). The results of the numerical simulation using MCM v.3.3.1 (with NO<sub>3</sub> and N<sub>2</sub>O<sub>5</sub> wall loss rate of 0.016 s<sup>-1</sup> and 3.3 × 10<sup>-4</sup> s<sup>-1</sup> respectively) for each of the reactants is shown by a red line, whereas the blue line shows the result of the same model with a doubled reaction constant for NO<sub>3</sub> + RO<sub>2</sub> reactions ( $k_{NO_3+RO_2} = 9.2 \times 10^{-12} \text{ cm}^3 \text{ molecule}^{-1} \text{ s}^{-1}$ ).

110

## References

- 115 Brown, S. S., Stark, H., and Ravishankara, A. R.: Applicability of the steady state approximation to the interpretation of atmospheric observations of NO<sub>3</sub> and N<sub>2</sub>O<sub>5</sub>, *J. Geophys. Res. -Atmos.*, 108, Art. 4539, doi:10.1029/2003JD003407, 2003.
- Fuchs, H., Hofzumahaus, A., Rohrer, F., Bohn, B., Brauers, T., Dorn, H. P., Haseler, R., Holland, F., Kaminski, M., Li, X., Lu, K., Nehr, S., Tillmann, R., Wegener, R., and Wahner, A.: Experimental evidence for efficient hydroxyl radical regeneration in isoprene oxidation, *Nat. Geosci.*, 6, 1023-1026, doi:10.1038/Ngeo1964, 2013.
- 120 Fuchs, H., Novelli, A., Rolletter, M., Hofzumahaus, A., Pfannerstill, E. Y., Kessel, S., Edtbauer, A., Williams, J., Michoud, V., Dusanter, S., Locoge, N., Zannoni, N., Gros, V., Truong, F., Sarda-Estevé, R., Cryer, D. R., Brumby, C. A., Whalley, L. K., Stone, D., Seakins, P. W., Heard, D. E., Schoemaeker, C., Blocquet, M., Coudert, S., Batut, S., Fittschen, C., Thames, A. B., Brune, W. H., Ernest, C., Harder, H., Müller, J. B. A., Elste, T., Kubistin, D., Andres, S., Bohn, B., Hohaus, T., Holland, F., Li, X., Rohrer, F., Kiendler-Scharr, A., Tillmann, R., Wegener, R., Yu, Z. J., Zou, Q., and Wahner, A.: Comparison of OH reactivity measurements in the atmospheric simulation chamber SAPHIR, *Atmos. Meas. Tech.*, 10, 4023-4053, doi:10.5194/amt-10-4023-2017, 2017a.
- 125 Fuchs, H., Tan, Z. F., Lu, K. D., Bohn, B., Broch, S., Brown, S. S., Dong, H. B., Gomm, S., Haseler, R., He, L. Y., Hofzumahaus, A., Holland, F., Li, X., Liu, Y., Lu, S. H., Min, K. E., Rohrer, F., Shao, M., Wang, B. L., Wang, M., Wu, Y. S., Zeng, L. M., Zhang, Y. S., Wahner, A., and Zhang, Y. H.: OH reactivity at a rural site (Wangdu) in the North China Plain: contributions from OH reactants and experimental OH budget, *Atmos. Chem. Phys.*, 17, 645-661, doi:10.5194/acp-17-645-2017, 2017b.
- 130 Hjorth, J., Ottobriani, G., and Restelli, G.: Reaction of the NO<sub>3</sub> radical with CO: Determination of an upper limit for the rate constant using FTIR spectroscopy, *Int. J. Chem. Kinet.*, 18, 819-827, doi:10.1002/kin.550180802, 1986.
- Hofzumahaus, A., Rohrer, F., Lu, K. D., Bohn, B., Brauers, T., Chang, C. C., Fuchs, H., Holland, F., Kita, K., Kondo, Y., Li, X., Lou, S. R., Shao, M., Zeng, L. M., Wahner, A., and Zhang, Y. H.: Amplified Trace Gas Removal in the Troposphere, *Science*, 324, 1702-1704, 2009.
- IUPAC: Task Group on Atmospheric Chemical Kinetic Data Evaluation, (Ammann, M., Cox, R.A., Crowley, J.N., Herrmann, H., Jenkin, M.E., McNeill, V.F., Mellouki, A., Rossi, M. J., Troe, J. and Wallington, T. J.) <http://iupac.pole-ether.fr/index.html>, 2019.
- 135 Jenkin, M. E., Wyche, K. P., Evans, C. J., Carr, T., Monks, P. S., Alfarra, M. R., Barley, M. H., McFiggans, G. B., Young, J. C., and Rickard, A. R.: Development and chamber evaluation of the MCM v3.2 degradation scheme for beta-caryophyllene, *Atmos. Chem. Phys.*, 12, 5275-5308, doi:10.5194/acp-12-5275-2012, 2012.
- Jenkin, M. E., Young, J. C., and Rickard, A. R.: The MCM v3.3.1 degradation scheme for isoprene, *Atmos. Chem. Phys.*, 15, 11433-11459, doi:10.5194/acp-15-11433-2015, 2015.
- 140 Lou, S., Holland, F., Rohrer, F., Lu, K., Bohn, B., Brauers, T., Chang, C. C., Fuchs, H., Haseler, R., Kita, K., Kondo, Y., Li, X., Shao, M., Zeng, L., Wahner, A., Zhang, Y., Wang, W., and Hofzumahaus, A.: Atmospheric OH reactivities in the Pearl River Delta - China in summer 2006: measurement and model results, *Atmos. Chem. Phys.*, 10, 11243-11260, doi:10.5194/acp-10-11243-2010, 2010.
- Richter, C.A.: Ozone Production in the Atmosphere Simulation Chamber SAPHIR, Ph.D. thesis, Forschungszentrum Jülich GmbH, University of Köln, [http://user.fz-juelich.de/record/62596/files/Energie&Umwelt\\_02.pdf](http://user.fz-juelich.de/record/62596/files/Energie&Umwelt_02.pdf), 2007.
- 145
